# Supplementary material for: Enhanced podocyte differentiation and changing drug toxicity sensitivity through pressure-controlled mechanical filtration stress on a glomerulus-on-a-chip
Source: Royal Society of Chemistry journal article supplement (doi:10.1039/d2lc00941b), 2022-12-06
Supplement: d2lc00941b1.pdf [file d2lc00941b1.pdf]

## Electronic Supplementary Information (ESI)

### Enhanced podocyte differentiation and changing drug toxicity sensitivity through pressure controlled mechanical filtrating stress on a glomerulus-on-a-chip

Kotaro Doi,<sup>a</sup> Hiroshi Kimura,<sup>b</sup> Soo Hyeon Kim,<sup>a</sup> Takehiko Wada,<sup>c</sup> Tetsuhiro Tanaka,<sup>d</sup> Akira Shimizu,<sup>e</sup> Takanori Sano,<sup>a</sup> Masamichi Chikamori,<sup>a</sup> Marie Shinohara,<sup>a</sup> Yukiko T. Matsunaga,<sup>a</sup> Masaomi Nangaku<sup>f</sup> and Teruo Fujii<sup>\*g</sup>

- a. Institute of Industrial Science, the University of Tokyo, Tokyo, JAPAN.
- b. Micro/Nano Technology Center, Tokai University, Kanagawa, JAPAN.
- c. Division of Nephrology, Endocrinology and Metabolism, Tokai University School of Medicine, Kanagawa, JAPAN.
- d. Department of Nephrology, Rheumatology and Endocrinology, Tohoku University Graduate School of Medicine, Miyagi, JAPAN.
- e. Department of Analytic Human Pathology, Nippon Medical School, Tokyo, JAPAN.
- f. Division of Nephrology and Endocrinology, the University of Tokyo Graduate School of Medicine, Tokyo, JAPAN
- g. The University of Tokyo, Tokyo, JAPAN

\* Corresponding Author

### Supplementary Information List

#### 1. Supplementary Figures

**Figure S1.** Fabrication of filtrating fluidic device

**Figure S2.** ECM validation for podocyte culture

**Figure S3.** Higher repeatability of basal compartment pressure for filtration flow in air pressure control

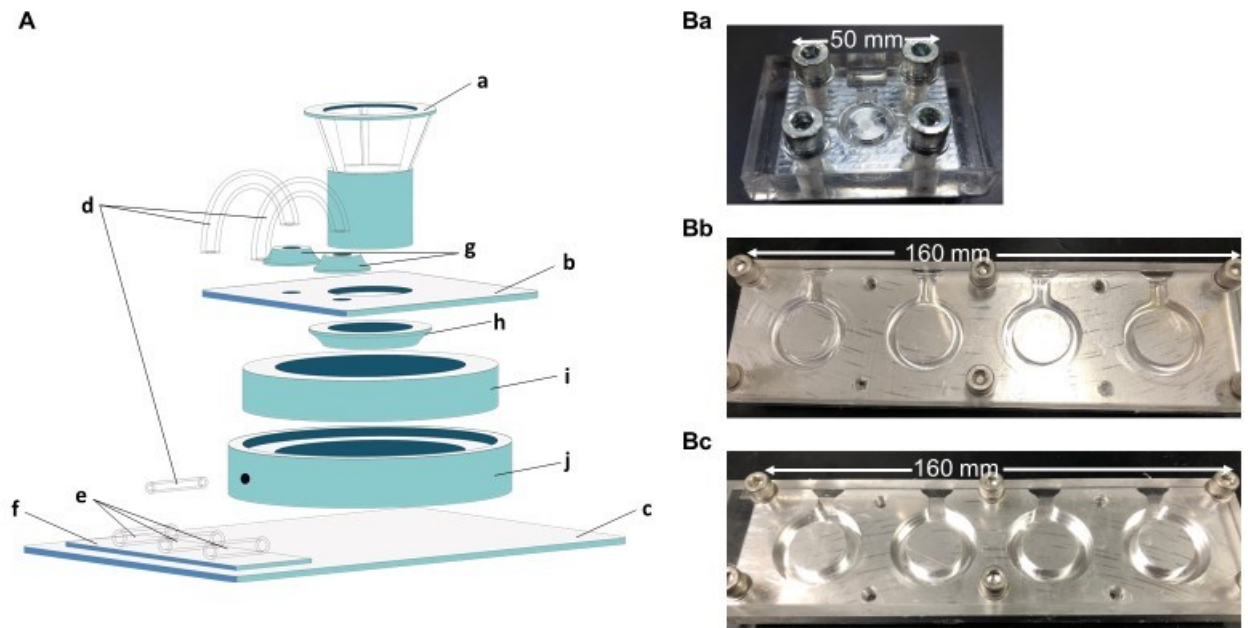

**Supplementary Figure 1** Fabrication of filtrating fluidic device:

(A) Components and assembly of filtrating fluidic device (a) culture insert, (b) upper glass plate, (c) bottom glass plate, (d) □ silicone tubing 1 mm inner diameter  $\times$  2 mm outer diameter, (e) □ silicone tubing 2 mm inner diameter  $\times$  3 mm outer diameter, (f) thin PDMS plate, (g) silicone tubing stabilizer, (h) elastic sealing ring, (i) upper holder ring, (j) bottom holder ring

(B) Molds used to PDMS parts: mold for elastic sealing ring (Ba), mold for upper well ring (Bb), and mold for bottom ring (Bc).

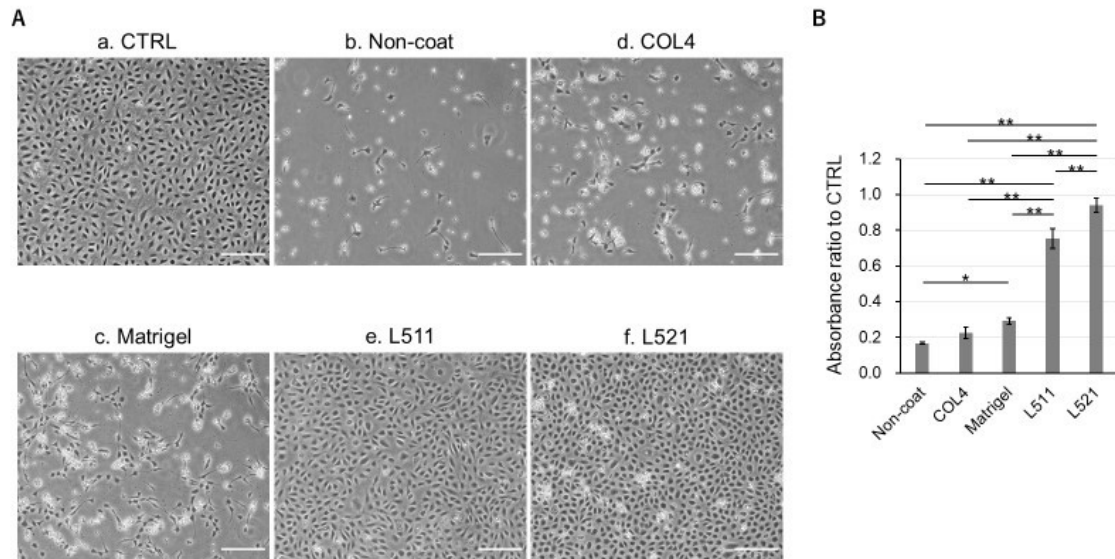

**Supplement Figure 2** ECM validation for podocyte culture

(A) Phase contrast images of HSMP at day 4 under the culture conditions of each extracellular matrix: (a) Basal media without ECM (control: CTRL) (b) F0 media without ECM (Non-coat) (c) F0 media with mouse type IV collagen (COL4) (d) F0 with Matrigel (e) F0 with recombinant human laminin  $\alpha 5\beta 1 \gamma 1$  (L511) (f) F0 with recombinant human laminin  $\alpha 5\beta 2 \gamma 1$  (L521), Scale bars: 200  $\mu$ m.

(B) Comparison of absorbance ratio to basal media condition among each culture condition of ECM by WST-8 assay: ANOVA with Tukey HSD test was performed to determine significant difference. Error bars represent standard deviation. n = 4,

\* < 0.005, \*\* < 0.0001

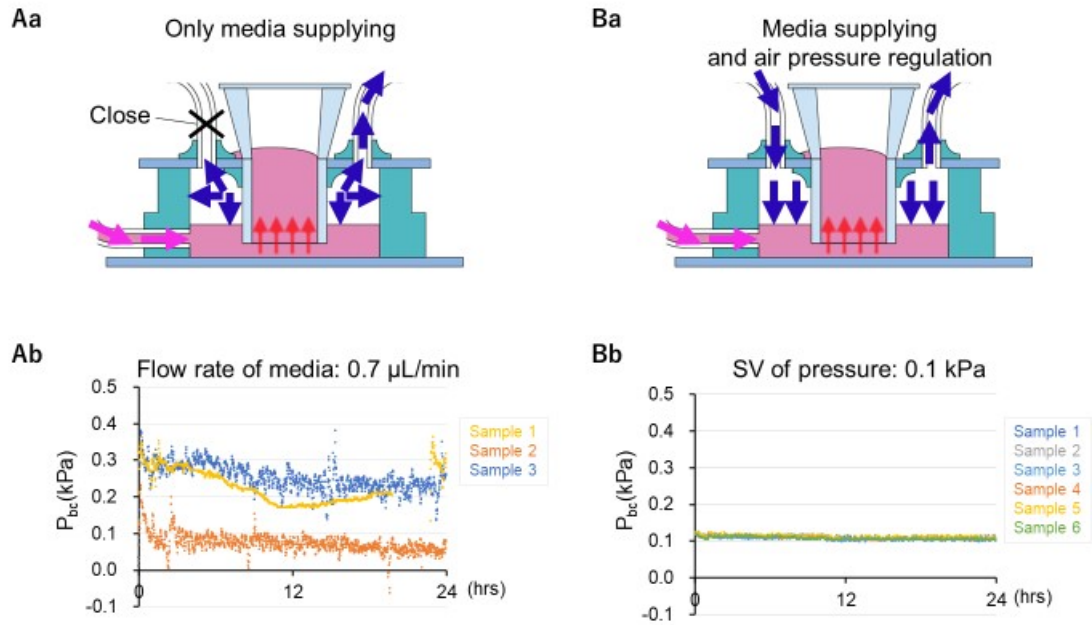

**Supplement figure 3** Higher repeatability of basal compartment pressure for filtration flow in air pressure control:

(A) Scheme and basal compartment pressure under the condition of volume control. In this condition, only media supplying was performed for filtration flow (Aa), where measured pressure of each sample was varied (Ab).

(B) Scheme and basal compartment pressure under the condition of air pressure control. In this condition, both of media supplying and air pressure regulation were performed for generating filtration flow (Ba), where the measured basal compartment pressure was completely consistent among all samples (Bb). Pink, blue and red arrows represent media, pressure and filtrating flow, respectively.
